# Supplementary material for: Severe in utero under-virilization in a 46,XY patient with Silver-Russell syndrome with 11p15 loss of methylation
Source: publisher site journal article supplement (doi:10.1515/jpem-2018-0464), 2019-01-24
Supplement: Supplementary file 2 [file Supplementary Figure.docx]

Supplementary Figure

MR images of the patient, obtained just before the gonadectomy at 15 years of age.

A) Sagittal image demonstrating the enlarged clitoris with a cavernous structure.

B) Coronal T2-weighed image. Bilateral gonads (asterisk) with high intensity are demonstrated at the level of the pubic crest. High intensity surrounding gonads correspond to the testicular adnexa.
